# Supplementary material for: Recyclable Xanthan/TiO2 Composite Cryogels towards the Photodegradation of Cr(VI) Ions and Methylene Blue Dye
Source: Hindawi journal article supplement (doi:10.1155/2019/8179842), 2019-02-10
Supplement: f1 [file 8179842.f1.pdf]

**Supplementary Material – MS 8179842**

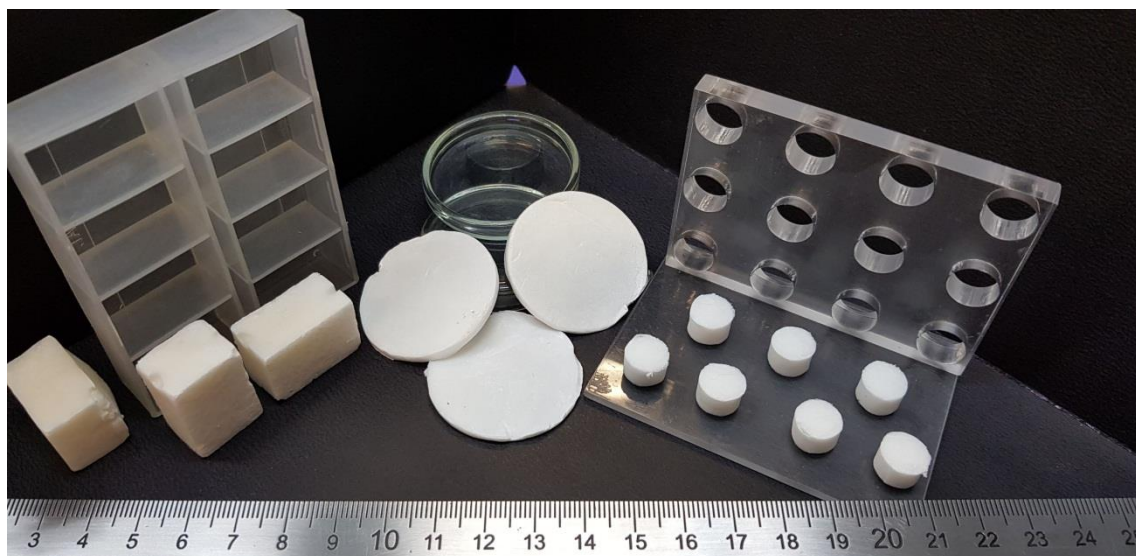

**Figure SM1.** Photographs of molds used and the resulting cryogels.

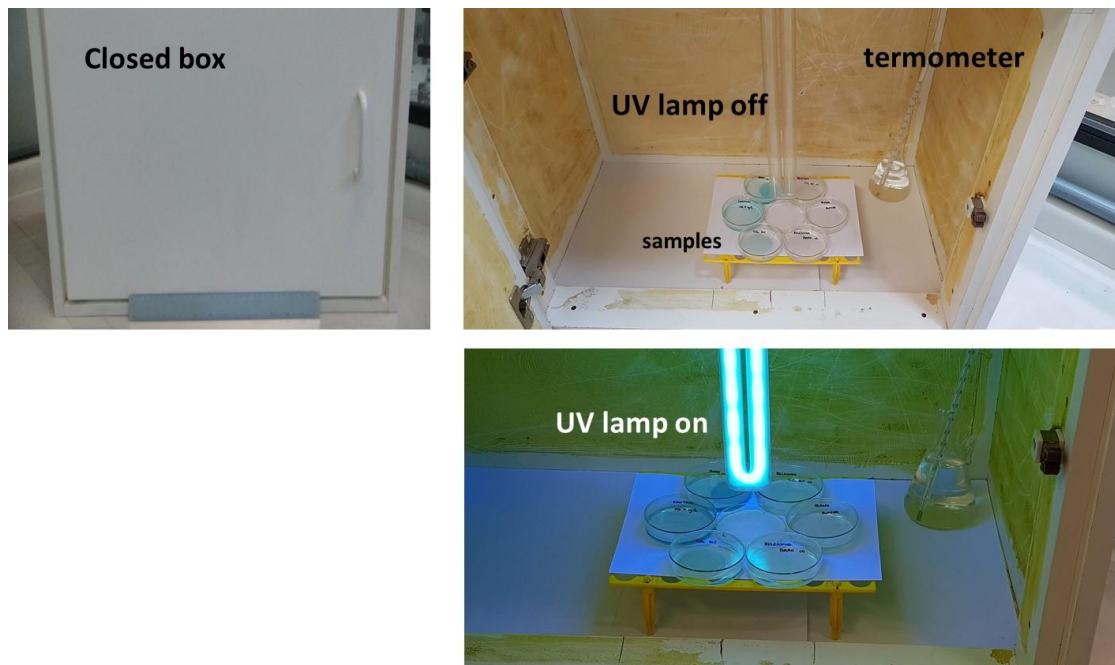

**Figure SM2** – Experimental setup for the photocatalytic experiments.

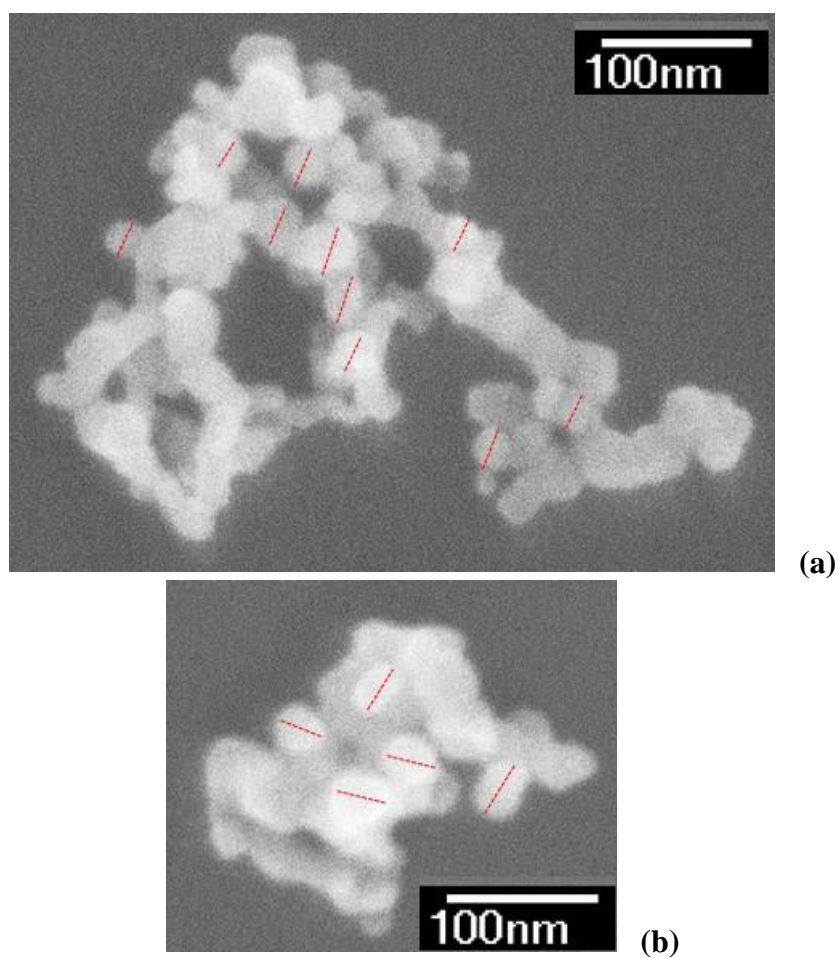

**Figure SM3** – Typical SEM images of TiO<sub>2</sub> P25 particles. The particles were not coated with gold prior to the analyses because they are semiconductor. The mean size of TiO<sub>2</sub> particles amounted to  $(30 \pm 5)$  nm, as an average of 15 measurements (red lines). The aggregates ranged from 100 nm to 500 nm, in agreement with the  $D_z$  values.

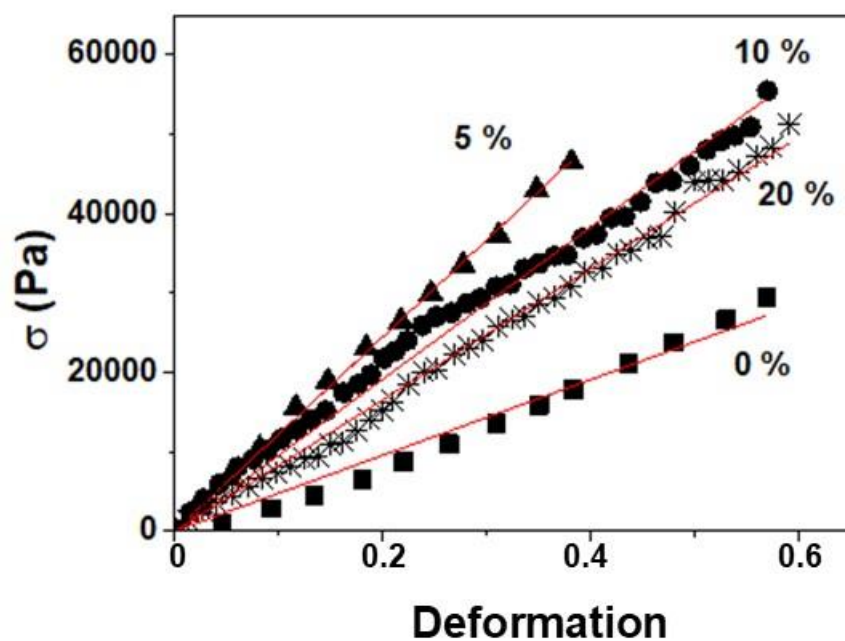

**Figure SM4** – Typical compressive stress ( $\sigma$ )-strain curves determined for bare XG cryogels (0 %) and XG/TiO<sub>2</sub> cryogels with 5%, 10% and 20% TiO<sub>2</sub> prepared at pH 4.

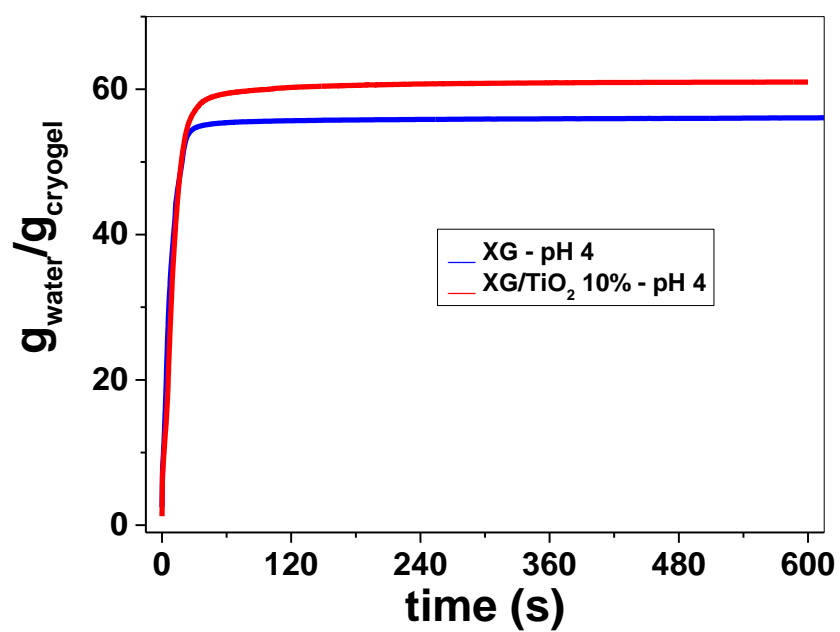

**Figure SM5.** Typical MilliQ water sorption curves determined for XG and XG/TiO<sub>2</sub> 10% cryogels prepared at pH 4, at  $(21 \pm 1)$  °C.

**Table SM1** – Bands assignment regarding the FTIR spectra obtained for XG and TiO<sub>2</sub> powder, and XG and XG/TiO<sub>2</sub> 10% cryogels.

| Wavenumber<br>(cm <sup>-1</sup> ) | Band Assignment                              | Cryogel                       | Powder                  |
|-----------------------------------|----------------------------------------------|-------------------------------|-------------------------|
| 3000-3500, broad                  | $\nu_{OH}$ intramolecular<br>hydrogen bond   | XG<br>XG/TiO <sub>2</sub> 10% | XG and TiO <sub>2</sub> |
| 2910                              | $\nu_{as} CH_2$                              | XG<br>XG/TiO <sub>2</sub> 10% | XG                      |
| 1725                              | $\nu C=O$ ester                              | XG<br>XG/TiO <sub>2</sub> 10% | -                       |
| 1600                              | $\nu C=O$ carboxylic<br>acid                 | XG<br>XG/TiO <sub>2</sub> 10% | XG                      |
| 1515                              | $\delta$ C-H bending                         | XG/TiO <sub>2</sub> 10%       | -                       |
| 1452                              | $\delta$ O-H carboxylic<br>acid bending      | XG/TiO <sub>2</sub> 10%       | -                       |
| 1404                              | $\delta$ C-O-H<br>carboxylic acid<br>bending | XG                            | XG                      |
| 1366                              | $\nu_{as} C=O$ carboxylate                   | XG<br>XG/TiO <sub>2</sub> 10% | XG                      |
| 1195                              | C-O-H glycosidic<br>ring                     | XG<br>XG/TiO <sub>2</sub> 10% | XG                      |
| 1154                              | C-O-H glycosidic<br>ring                     | XG<br>XG/TiO <sub>2</sub> 10% | XG                      |

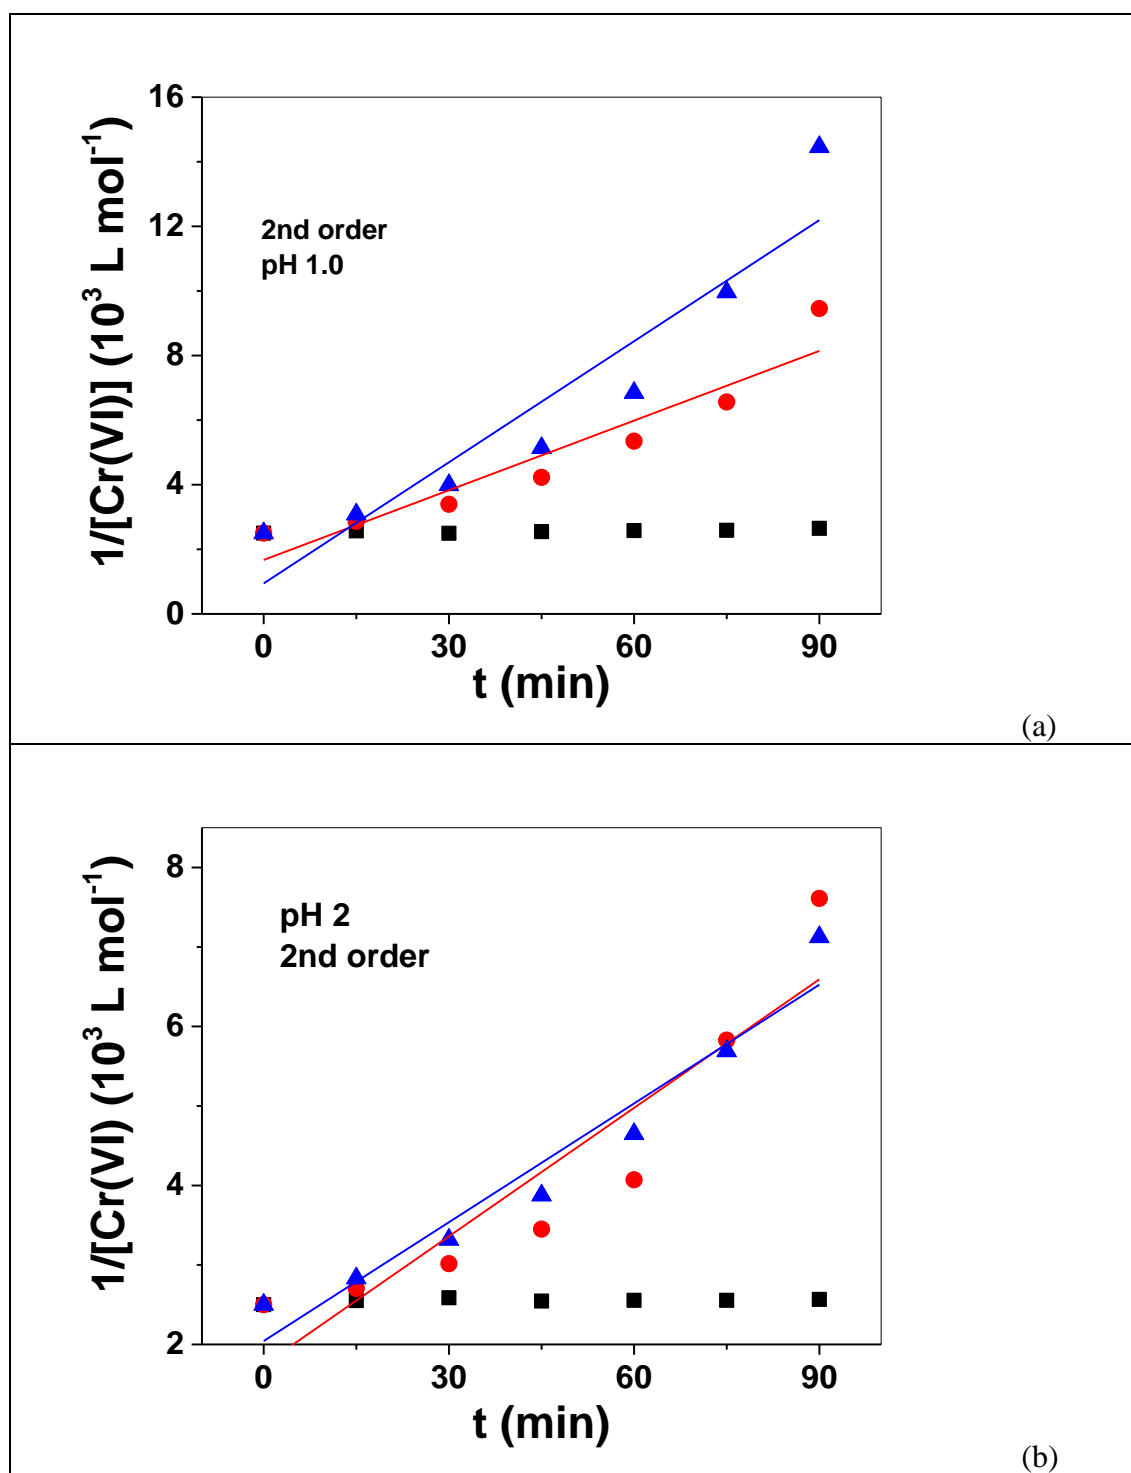

**Figure SM 6.** Fittings to second order kinetic model for the experimental data of reduction of Cr(VI) at (a) pH 1.0 and (b) pH 2.0 (see Figure 8).

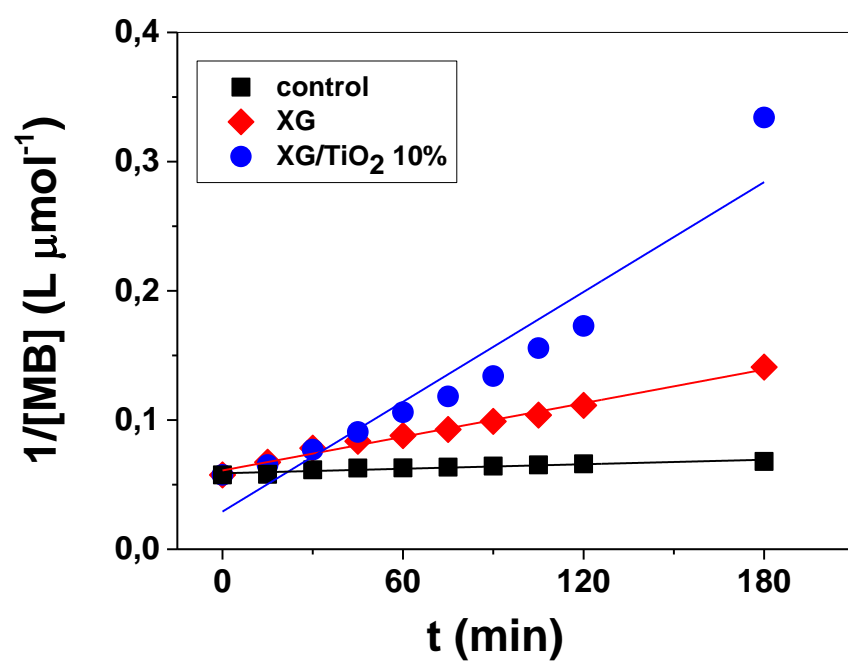

**Figure SM 7.** Fittings to second order kinetic model for the experimental data of degradation of MB at pH 7.0 (see Figure 9).
